# Supplementary material for: Comparison of Different Machine Learning Classifiers for Glaucoma Diagnosis Based on Spectralis OCT
Source: MDPI journal article supplement (doi:10.3390/diagnostics11091718), 2021-09-19
Supplement: s1 [file s1]

**Table S1.** All variables used in the machine learning classifiers

| cRNFL<br>(n=7) | BMO-MRW<br>(n=7) | ETDRS<br>(n=36) |        | PPAA<br>(n=64) |        |        |        |
|----------------|------------------|-----------------|--------|----------------|--------|--------|--------|
| cRNFL_T        | MRW_T            | mFT_T1          | GCL_T1 | rFT_11         | rFT_31 | rFT_51 | rFT_71 |
| cRNFL_TI       | MRW_TI           | mFT_T2          | GCL_T2 | rFT_12         | rFT_32 | rFT_52 | rFT_72 |
| cRNFL_NI       | MRW_NI           | mFT_I1          | GCL_I1 | rFT_13         | rFT_33 | rFT_53 | rFT_73 |
| cRNFL_N        | MRW_N            | mFT_I2          | GCL_I2 | rFT_14         | rFT_34 | rFT_54 | rFT_74 |
| cRNFL_NS       | MRW_NS           | mFT_N1          | GCL_N1 | rFT_15         | rFT_35 | rFT_55 | rFT_75 |
| cRNFL_TS       | MRW_TS           | mFT_N2          | GCL_N2 | rFT_16         | rFT_36 | rFT_56 | rFT_76 |
| cRNFL_G        | MRW_G            | mFT_S1          | GCL_S1 | rFT_17         | rFT_37 | rFT_57 | rFT_77 |
|                |                  | mFT_S2          | GCL_S2 | rFT_18         | rFT_38 | rFT_58 | rFT_78 |
|                |                  | mFT_C           | GCL_C  | rFT_21         | rFT_41 | rFT_61 | rFT_81 |
|                |                  | mRNFL_T1        | IPL_T1 | rFT_22         | rFT_42 | rFT_62 | rFT_82 |
|                |                  | mRNFL_T2        | IPL_T2 | rFT_23         | rFT_43 | rFT_63 | rFT_83 |
|                |                  | mRNFL_I1        | IPL_I1 | rFT_24         | rFT_44 | rFT_64 | rFT_84 |
|                |                  | mRNFL_I2        | IPL_I2 | rFT_25         | rFT_45 | rFT_65 | rFT_85 |
|                |                  | mRNFL_N1        | IPL_N1 | rFT_26         | rFT_46 | rFT_66 | rFT_86 |
|                |                  | mRNFL_N2        | IPL_N2 | rFT_27         | rFT_47 | rFT_67 | rFT_87 |
|                |                  | mRNFL_S1        | IPL_S1 | rFT_28         | rFT_48 | rFT_68 | rFT_88 |
|                |                  | mRNFL_S2        | IPL_S2 |                |        |        |        |
|                |                  | mRNFL_C         | IPL_C  |                |        |        |        |

cRNFL: circumpapillary retinal nerve fiber layer; BMO-MRW: Bruch's membrane opening opening-minimal rim width; ETDRS: early treatment diabetes retinopathy study; PPAA: posterior pole asymmetry analysis; mFT: macular full thickness; mRNFL: macular retinal nerve fiber layer; GCL: ganglion cell layer; IPL: inner plexiform layer; rFT: retinal full thickness; T: temporal; TI: inferotemporal; NI: inferonasal; N: nasal; NS: superonasal; TS: superotemporal; G: global; C: central; S: superior; I: inferior

**Table S2.** Variable importance ranking using the five machine learning classifiers for all glaucoma eyes (only the first 15 important variables shown)

| Rank | CIT      | LMT      | C5.0     | RF       | XGBoost  |
|------|----------|----------|----------|----------|----------|
| 1    | cRNFL_G  | cRNFL_G  | GCL_T2   | GCL_T2   | GCL_T2   |
| 2    | GCL_T1   | GCL_T1   | MRW_TI   | cRNFL_G  | cRNFL_G  |
| 3    | GCL_T2   | GCL_T2   | cRNFL_TS | GCL_T1   | GCL_T1   |
| 4    | MRW_G    | MRW_G    | cRNFL_NS | MRW_G    | MRW_G    |
| 5    | MRW_TI   | MRW_TI   | GCL_I1   | GCL_I1   | cRNFL_TS |
| 6    | GCL_I1   | GCL_I1   | mRNFL_S2 | cRNFL_TS | GCL_I1   |
| 7    | cRNFL_TS | cRNFL_TS | cRNFL_TI | MRW_TI   | MRW_TI   |
| 8    | MRW_TS   | MRW_TS   | GCL_T1   | MRW_NI   | MRW_NI   |
| 9    | cRNFL_TI | cRNFL_TI | MRW_N    | IPL_T2   | MRW_N    |
| 10   | MRW_NI   | MRW_NI   | MRW_G    | cRNFL_TI | MRW_T    |
| 11   | IPL_I1   | IPL_I1   | rFT_33   | MRW_TS   | MRW_TS   |
| 12   | GCL_S2   | GCL_S2   | mRNFL_I1 | rFT_28   | rFT_28   |
| 13   | rFT_28   | rFT_28   | cRNFL_G  | GCL_I2   | rFT_88   |
| 14   | IPL_T1   | IPL_T1   | rFT_88   | mRNFL_I2 | IPL_T2   |
| 15   | GCL_S1   | GCL_S1   | IPL_T1   | MRW_T    | rFT_33   |

CIT: conditional inference trees; LMT: logistic model tree; RF: random forest; XGBoost: extreme gradient boosting; AUC: area under the receiver operating characteristic (roc) curve

**Table S3.** Variable importance ranking using the five machine learning classifiers for early glaucoma eyes (only the first 15 important variables shown)

| Rank | CIT      | LMT      | C5.0     | RF       | XGBoost  |
|------|----------|----------|----------|----------|----------|
| 1    | GCL_T2   | GCL_T2   | GCL_T2   | GCL_T2   | GCL_T2   |
| 2    | cRNFL_G  | cRNFL_G  | cRNFL_TS | cRNFL_G  | GCL_T1   |
| 3    | GCL_T1   | GCL_T1   | MRW_TI   | GCL_T1   | cRNFL_G  |
| 4    | MRW_G    | MRW_G    | mRNFL_S2 | MRW_G    | MRW_G    |
| 5    | MRW_TI   | MRW_TI   | cRNFL_NS | cRNFL_TS | cRNFL_TS |
| 6    | cRNFL_TS | cRNFL_TS | GCL_T1   | GCL_I1   | GCL_I1   |
| 7    | GCL_I1   | GCL_I1   | MRW_G    | MRW_TS   | MRW_TI   |
| 8    | MRW_TS   | MRW_TS   | MRW_N    | MRW_TI   | IPL_T1   |
| 9    | IPL_T1   | IPL_T1   | mRNFL_S1 | IPL_T2   | rFT_88   |
| 10   | GCL_S2   | GCL_S2   | rFT_88   | MRW_NI   | MRW_TS   |
| 11   | IPL_T2   | IPL_T2   | GCL_I1   | IPL_T1   | rFT_23   |
| 12   | IPL_I1   | IPL_I1   | mRNFL_I1 | rFT_28   | MRW_N    |
| 13   | MRW_NI   | MRW_NI   | GCL_S2   | IPL_I1   | IPL_T2   |
| 14   | GCL_S1   | GCL_S1   | IPL_T1   | MRW_N    | MRW_NI   |
| 15   | MRW_N    | MRW_N    | IPL_N1   | MRW_NS   | rFT_28   |

CIT: conditional inference trees; LMT: logistic model tree; RF: random forest; XGBoost: extreme gradient boosting; AUC: area under the receiver operating characteristic (roc) curve

**Table S4.** Variable importance ranking using the five machine learning classifiers for moderate glaucoma eyes (only the first 15 important variables shown)

| Rank | CIT      | LMT      | C5.0     | RF       | XGBoost  |
|------|----------|----------|----------|----------|----------|
| 1    | GCL_T1   | cRNFL_G  | GCL_T2   | GCL_T2   | GCL_T2   |
| 2    | cRNFL_G  | GCL_T1   | MRW_N    | cRNFL_G  | cRNFL_G  |
| 3    | GCL_T2   | GCL_T2   | cRNFL_G  | MRW_G    | MRW_G    |
| 4    | GCL_I1   | GCL_I1   | GCL_T1   | GCL_T1   | GCL_T1   |
| 5    | cRNFL_TI | cRNFL_TS | MRW_G    | IPL_T2   | MRW_N    |
| 6    | cRNFL_TS | cRNFL_TI | cRNFL_TS | cRNFL_TS | cRNFL_TS |
| 7    | mRNFL_I2 | MRW_G    | cRNFL_NS | MRW_NI   | MRW_NI   |
| 8    | IPL_T2   | IPL_T2   | mRNFL_I2 | mRNFL_TI | GCL_I1   |
| 9    | GCL_N1   | NFL_I2   | MRW_NS   | GCL_I1   | IPL_T2   |
| 10   | MRW_G    | MRW_NI   | cRNFL_TI | MRW_TI   | cRNFL_T  |
| 11   | IPL_I1   | MRW_TI   | GCL_I1   | MRW_N    | cRNFL_TI |
| 12   | MRW_TI   | IPL_I1   | mRNFL_I1 | mRNFL_I2 | rFT_86   |
| 13   | MRW_NI   | GCL_N1   | MRW_TI   | MRW_NS   | mRNFL_I2 |
| 14   | IPL_T1   | GCL_S1   | cRNFL_NI | MRW_T    | MRW_T    |
| 15   | GCL_S1   | GCL_S2   | rFT_54   | rFT_28   | rFT_33   |

CIT: conditional inference trees; LMT: logistic model tree; RF: random forest; XGBoost: extreme gradient boosting; AUC: area under the receiver operating characteristic (roc) curve

**Table S5.** Variable importance ranking using the five machine learning classifiers for severe glaucoma eyes (only 15 most important variables shown)

| Rank | CIT      | LMT      | C5.0     | RF       | XGBoost  |
|------|----------|----------|----------|----------|----------|
| 1    | MRW_TI   | MRW_TI   | MRW_T    | cRNFL_G  | cRNFL_G  |
| 2    | MRW_G    | MRW_G    | MRW_TI   | MRW_TI   | mRNFL_I2 |
| 3    | cRNFL_G  | cRNFL_G  | GCL_I1   | mRNFL_I2 | GCL_I1   |
| 4    | GCL_I1   | GCL_I1   | mRNFL_I2 | GCL_I1   | MRW_TI   |
| 5    | GCL_T1   | GCL_T1   | cRNFL_TS | cRNFL_TI | MRW_T    |
| 6    | MRW_TS   | MRW_TS   | cRNFL_NS | GCL_I2   | GCL_I2   |
| 7    | mRNFL_I2 | mRNFL_I2 | cRNFL_G  | MRW_G    | MRW_G    |
| 8    | MRW_NS   | MRW_NS   | GCL_T2   | GCL_T1   | cRNFL_TI |
| 9    | cRNFL_TI | cRNFL_TI | cRNFL_TI | GCL_T2   | GCL_T1   |
| 10   | MRW_NI   | MRW_NI   | rFT_33   | MRW_NI   | GCL_T2   |
| 11   | cRNFL_TS | cRNFL_TS | MRW_G    | rFT_28   | MRW_TS   |
| 12   | MRW_T    | MRW_T    | rFT_43   | MRW_TS   | MRW_NI   |
| 13   | rFT_28   | rFT_28   | MRW_NS   | MRW_T    | cRNFL_TS |
| 14   | MRW_N    | MRW_N    | GCL_I2   | rFT_38   | IPL_T2   |
| 15   | rFT_27   | rFT_27   | MRW_TS   | rFT_17   | rFT_28   |

CIT: conditional inference trees; LMT: logistic model tree; RF: random forest; XGBoost: extreme gradient boosting; AUC: area under the receiver operating characteristic (roc) curve
